# Supplementary material for: The high energy X-ray probe (HEX-P): Resolving the nature of Sgr A* flares, compact object binaries and diffuse X-ray emission in the Galactic center and beyond
Source: Frontiers journal article supplement (doi:10.3389/fspas.2023.1292130), 2024-01-08
Supplement: Data_Sheet_1.PDF [file Data_Sheet_1.PDF]

## ***Supplementary Material***

This document contains tables that did not fit in the main text of our paper.

### **1 SUPPLEMENTARY TABLES**

| Acronym | Meaning                            |
|---------|------------------------------------|
| AGN     | active galactic nucleus            |
| BH      | black hole                         |
| BH-LMXB | black hole low-mass X-ray binary   |
| CHXE    | central hard X-ray emission        |
| CMZ     | Central Molecular Zone             |
| CR      | cosmic ray                         |
| CV      | cataclysmic variable               |
| FOV     | field of view                      |
| FSCV    | fast-spinning cataclysmic variable |
| GC      | Galactic center                    |
| GRXE    | Galactic ridge X-ray emission      |
| HET     | High Energy Telescope              |
| HEX-P   | High Energy X-ray Probe            |
| HVS     | hypervelocity star                 |
| IP      | intermediate polar                 |
| IR      | infrared                           |
| LECR    | low energy cosmic rays             |
| LET     | Low Energy Telescope               |
| LLIP    | low-luminosity intermediate polar  |
| LMXB    | low-mass X-ray binary              |
| LW      | limiting window                    |
| MC      | molecular cloud                    |
| mCV     | magnetic CV                        |
| NIR     | near infrared                      |
| NS      | neutron star                       |
| NS-LMXB | neutron star low-mass X-ray binary |
| NSC     | nuclear star cluster               |
| pc      | parsec                             |
| PMS     | pre-main sequence                  |
| PSF     | point spread function              |
| PWN     | pulsar wind nebula                 |
| SED     | spectral energy distribution       |
| SMBH    | supermassive black hole            |
| SNIa    | type Ia supernova                  |
| SNR     | supernova remnant                  |
| ToO     | target of opportunity              |
| VFXT    | very faint X-ray transient         |
| WD      | white dwarf                        |
| XRB     | X-ray binary                       |
| YSO     | young stellar object               |

Table S1. List of acronyms used in this paper, along with their meanings.

**Table S2.** *HEX-P*'s sensitivity limits for detecting and characterizing X-ray sources in the GC.

| Goals                                       | Measurement criteria                                                        | $L_X^{\min}$ [erg s <sup>-1</sup> ] <sup>*</sup> |
|---------------------------------------------|-----------------------------------------------------------------------------|--------------------------------------------------|
| Source classification                       | Hardness ratio (3-10 vs 10-40 keV)<br>with < 20% error                      | $1 \times 10^{32}$                               |
| Source identification                       | Discerning between thermal and PL<br>spectra with > 4 $\sigma$ significance | $3 \times 10^{32}$                               |
| Parameter determination                     | $kT$ and $\Gamma$ with 20% error                                            | $8 \times 10^{32}$                               |
| Variability detection                       | X-ray flux with < 10% error                                                 | $1 \times 10^{32}$                               |
| Periodicity detection ( $P \gtrsim 1$ hr)   | > 4 $\sigma$ significance                                                   | $3 \times 10^{32}$                               |
| Periodicity detection ( $P \lesssim 1$ sec) | > 4 $\sigma$ significance                                                   | TBD                                              |

<sup>\*</sup> The column labeled by  $L_X^{\min}$  refers to the X-ray luminosity above which the measurement criteria will be met. We assumed 100 ks exposure per field for estimating the limiting  $L_X^{\min}$  values based on XSPEC simulations.

**Table S3.** The filaments incorporated in the GC simulations described in Sections 5.4 and 8.2. While best-fit values from current observations are very poorly constrained, *HEX-P* will be able to measure their spectral properties with much better sensitivity (Section 8.2).

| Label | Name                      | $N_H^a$<br>[ $10^{22}$ cm <sup>-2</sup> ] | $\Gamma^a$               | Flux (2-10 keV)<br>[erg cm <sup>-2</sup> s <sup>-1</sup> ] |
|-------|---------------------------|-------------------------------------------|--------------------------|------------------------------------------------------------|
| f1    | G359.97-0.038             | $11.7^{+5.1}_{-1.9}$                      | $1.4^{+0.8}_{-0.3}$      | $1.1 \times 10^{-13}$                                      |
| f2    | G359.964-0.052            | $11.1^{+2.4}_{-1.5}$                      | $1.9^{+0.5}_{-0.3}$      | $2.3 \times 10^{-13}$                                      |
| f3    | G359.95-0.04 <sup>b</sup> | $6.0^{+2.0}_{-1.0}$ (12)                  | $1.8^{+0.3}_{-0.2}$      | $6.0 \times 10^{-13}$                                      |
| f4    | G359.889-0.081 (Sgr A-E)  | $31.4^{+5.4}_{-2.0}$                      | $1.3^{+0.6}_{-0.2}$      | $4.7 \times 10^{-13}$                                      |
| f5    | G0.029-0.06               | $6.3^{+1.9}_{-2.8}$                       | $1.1^{+0.4}_{-0.4}$      | $1.2 \times 10^{-13}$                                      |
| f6    | G0.017-0.044              | $0.0^{+22.0}_{-0.0}$ (12)                 | $-0.7^{+3.0}_{-6.0}$ (2) | $4.0 \times 10^{-14}$                                      |
| f7    | G0.007-0.014              | $5.7^{+16.8}_{-5.7}$                      | $1^{+3.4}_{-1.7}$        | $2.0 \times 10^{-14}$                                      |
| f8    | G359.97-0.009             | $9.6^{+8.8}_{-5.4}$                       | $1.2^{+0.7}_{-0.6}$      | $4.0 \times 10^{-14}$                                      |
| f9    | G359.96-0.028             | $7.2^{+4.5}_{-3.2}$                       | $0.9^{+0.6}_{-0.4}$      | $5.0 \times 10^{-14}$                                      |
| f10   | G359.942-0.03             | $58.8^{+32.8}_{-32.8}$ (12)               | $4.1^{+3.0}_{-2.4}$ (2)  | $2.0 \times 10^{-14}$                                      |
| f11   | G359.94-0.05              | $-0.0^{+9.3}_{-0.0}$ (12)                 | $-0.4^{+1.4}_{-1.0}$ (1) | $3.0 \times 10^{-14}$                                      |
| f12   | G359.933-0.037            | $8.3^{+5.8}_{-4.2}$                       | $0.7^{+0.4}_{-0.5}$      | $5.0 \times 10^{-14}$                                      |

<sup>a</sup> Best-fit parameters from Johnson et al. (2009) were used to model the filaments in our simulation, except for f3 (as described below), and for f6, f10, and f11, for which we used the values indicated in parenthesis. This was done because of the exceptionally poor constraints and improbable best-fit values given for those filaments.

<sup>b</sup> The PWN G359.95-0.04 and its central pulsar were modeled separately for our simulations, assuming an absorbed power-law with  $N_H = 12$ , and  $\Gamma = 2.0$  and 1.5, respectively. These values are based on analysis by Wang et al. (2006).

## REFERENCES

- Johnson, S. P., Dong, H., and Wang, Q. D. (2009). A Large Scale Survey of X-Ray Filaments in the Galactic Center. *Monthly Notices of the Royal Astronomical Society* 399, 1429–1440. doi:10.1111/j.1365-2966.2009.15362.x
- Wang, Q. D., Lu, F. J., and Gotthelf, E. V. (2006). G359.95-0.04: An Energetic Pulsar Candidate Near Sgr A\*. *Monthly Notices of the Royal Astronomical Society* 367, 937–944. doi:10.1111/j.1365-2966.2006.09998.x
